# Supplementary material for: Below Thermoneutrality, Changes in Activity Do Not Drive Changes in Total Daily Energy Expenditure between Groups of Mice
Source: PubMed Central journal article supplement (PMC3556741; doi:10.1016/j.cmet.2012.10.008), 2012-11-07
Supplement: mmc1.pdf [file mmc1.pdf]

## **Supplemental Information**

### **Below Thermoneutrality, Changes in Activity Do Not Drive Changes in Total Daily Energy Expenditure between Groups of Mice**

**Sam Virtue, Patrick Even, and Antonio Vidal-Puig**

#### **SUPPLEMENTAL INVENTORY**

Figure S1 provides details regarding the absolute energy expenditure corrected for body weight of each of the groups at different temperatures and demonstrates the levels of variance in the energy expenditure at different temperatures. This relates to data from figures 1, 2 and 3.

Table S1 provides regression coefficients for body weight and activity using a linear regression model for animals studied. This provides an alternative statistical method for demonstrating the results shown in figures 1,2 and 3.

Table S2 provides general physical characteristics and raw data values for the groups under study that have been used for all the analyses in the publication.

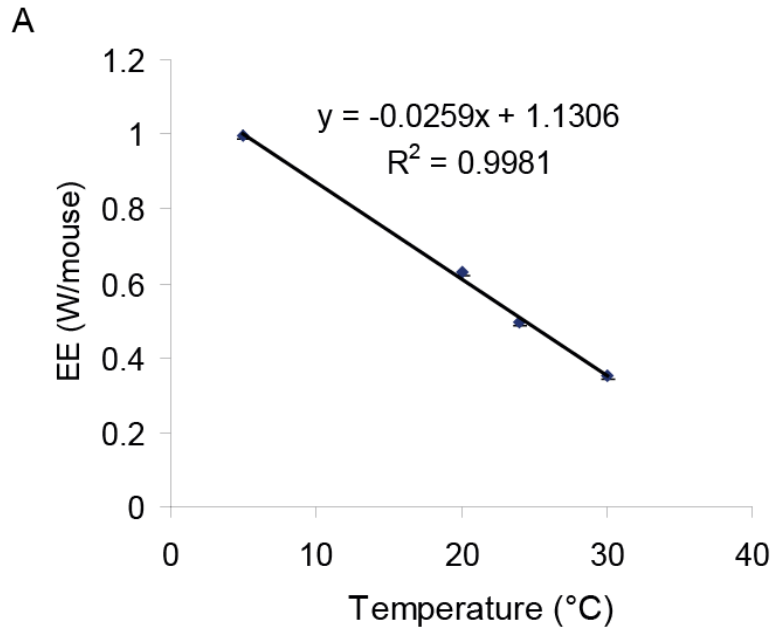

B

| Temperature | CV     |
|-------------|--------|
| 5°C         | 3.79%  |
| 21°C        | 6.88%  |
| 24°C        | 8.44%  |
| 30°C        | 10.87% |

Supplemental Figure 1. A) Graph showing relationship between EE and bodyweight for mice at different temperatures after correction for body weight using ANCOVA. Mice evaluated at a bodyweight of 30.6g. Data presented +/- SEM. B) Coefficient of Variances for the data shown in A).

| Model |            | Unstandardized Coefficients |            | Standardized Coefficients | t     | Sig. |
|-------|------------|-----------------------------|------------|---------------------------|-------|------|
|       |            | B                           | Std. Error | Beta                      |       |      |
| 30°C  | (Constant) | -.035                       | .084       |                           | -.421 | .677 |
|       | Activity   | .081                        | .026       | .443                      | 3.095 | .005 |
|       | BW         | .011                        | .003       | .596                      | 4.166 | .000 |
| 24°C  | (Constant) | .167                        | .121       |                           | 1.373 | .195 |
|       | Activity   | .077                        | .053       | .371                      | 1.450 | .173 |
|       | BW         | .009                        | .004       | .597                      | 2.333 | .038 |
| 20°C  | (Constant) | .195                        | .106       |                           | 1.852 | .075 |
|       | Activity   | .016                        | .036       | .065                      | .444  | .661 |
|       | BW         | .014                        | .003       | .633                      | 4.354 | .000 |
| 5°C   | (Constant) | .395                        | .139       |                           | 2.848 | .022 |
|       | Activity   | .142                        | .199       | .108                      | .714  | .496 |
|       | BW         | .018                        | .003       | .924                      | 6.084 | .000 |

Supplemental table 1 related to figures 1,2 and 3

Table gives regression coefficients for all groups of animals where activity was measured by beam breaks.

Energy expenditure (Watts/Mouse) is the dependent variable.

Body weight (g) and activity (counts/s) are independent variables.

|                                | CLAMS        |      | Metatrace    |      | Average       | SEM   | Average      | SEM   |
|--------------------------------|--------------|------|--------------|------|---------------|-------|--------------|-------|
|                                | Average      | SEM  | Average      | SEM  |               |       |              |       |
| Temperature (°C)               | 20           |      | 30           |      | 24            |       | 5            |       |
| Weight (g)                     | <b>33.1</b>  | 0.33 | <b>29.8</b>  | 0.32 | <b>27.6</b>   | 0.90  | <b>30.0</b>  | 1.33  |
| Activity beam break (counts/s) | <b>0.37</b>  | 0.03 | <b>0.46</b>  | 0.03 | <b>0.31</b>   | 0.03  | <b>0.22</b>  | 0.01  |
| EE (Watts)                     | <b>0.66</b>  | 0.01 | <b>0.34</b>  | 0.01 | <b>0.46</b>   | 0.01  | <b>0.99</b>  | 0.03  |
|                                | Forceplate   |      |              |      | Running Wheel |       |              |       |
|                                | Average      | SEM  | Average      | SEM  | Average       | SEM   | Average      | SEM   |
| Temperature (°C)               | 30           |      | 20           |      | 28            |       | 21           |       |
| Weight (g)                     | <b>27.8</b>  | 0.95 | <b>27.5</b>  | 0.87 | <b>30.2</b>   | 0.43  | <b>31.1</b>  | 0.77  |
| Activity Force plate (μV/s)    | <b>35.94</b> | 3.55 | <b>44.93</b> | 3.81 |               |       |              |       |
| Wheel running (m/s)            |              |      |              |      | <b>0.051</b>  | 0.008 | <b>0.047</b> | 0.009 |
| EE (Watts)                     | <b>0.42</b>  | 0.02 | <b>0.60</b>  | 0.03 | <b>0.51</b>   | 0.03  | <b>0.69</b>  | 0.03  |

Supplemental Table 2 relating to figures 1, 2, 3 and 4. Average body weight, activity and energy expenditure for all groups of mice used in this study.
